# Supplementary material for: Football Compared with Usual Care in Men with Prostate Cancer (FC Prostate Community Trial): A Pragmatic Multicentre Randomized Controlled Trial
Source: PubMed Central journal article supplement (PMC6349963; doi:10.1007/s40279-018-1031-0), 2018-12-01
Supplement: 40279_2018_1031_MOESM1_ESM.pdf [file 40279_2018_1031_MOESM1_ESM.pdf]

## Electronic Supplementary Material

This supplementary material has been provided by the authors to give readers additional information about their work.

Supplement to: Bjerre ED<sup>1</sup>, Brasso K<sup>2</sup>, Jørgensen AB, BSc<sup>3</sup>, Petersen TH<sup>3</sup>, Eriksen AR<sup>3</sup>, Tolver A<sup>4</sup>, Christensen JF<sup>5</sup>, Poulsen MH<sup>6</sup>, Madsen SS<sup>7</sup>, Østergren PB<sup>8</sup>, Borre M<sup>9</sup>, Krustrup P<sup>10</sup>, Johansen C<sup>11</sup>, Rørth M<sup>12</sup>, Midtgaard J<sup>13</sup>. Football compared to usual care in men with prostate cancer (FC Prostate Community trial): a pragmatic multicentre randomised controlled trial. *Sports Medicine*.

Corresponding author: Eik Dybboe Bjerre; [eb@ucsf.dk](mailto:eb@ucsf.dk), telephone: +45 22749076 ORCID ID: 0000-0001-9370-5162

### Affiliations:

- 1) The University Hospitals' Centre for Health Research, Rigshospitalet, 2100 Copenhagen Ø, Denmark
- 2) Copenhagen Prostate Cancer Center, Department of Urology, Rigshospitalet, University of Copenhagen, 2100 Copenhagen Ø, Denmark
- 3) The University Hospitals' Centre for Health Research, Rigshospitalet, 2100 Copenhagen Ø, Denmark
- 4) Data Science Laboratory, Department of Mathematical Sciences, University of Copenhagen, 2100 Copenhagen Ø, Denmark
- 5) Centre of Inflammation and Metabolism / Centre for Physical Activity Research, Rigshospitalet, 2100 Copenhagen Ø, Denmark;
- 6) Department of Urology, Odense University Hospital, 5000 Odense C, Denmark
- 7) Department of Urology, Hospital of Southwest Denmark Esbjerg, 6700 Esbjerg, Denmark
- 8) Department of Urology, Herlev and Gentofte University Hospital, 2730 Herlev, Denmark
- 9) Department of Urology, Aarhus University Hospital, 8200 Aarhus N, Denmark
- 10) University of Southern Denmark, Department of Sports Science and Clinical Biomechanics, 5000 Odense C, Denmark & Sport and Health Sciences, College of Life and Environmental Sciences, University of Exeter, United Kingdom
- 11) Danish Cancer Society Research Center, 2100 Copenhagen Ø, Denmark
- 12) Department of Oncology, Rigshospitalet, University of Copenhagen, 2100 Copenhagen Ø, Denmark
- 13) The University Hospitals' Centre for Health Research, Rigshospitalet, 2100 Copenhagen Ø, Denmark and Department of Public Health, University of Copenhagen, 2100 Copenhagen Ø, Denmark

**ESM Table 1** Safety outcomes for ITT Population

|                                        | Football<br>group<br>(n=109) | Usual care<br>group<br>(n=105) |
|----------------------------------------|------------------------------|--------------------------------|
| Safety outcomes                        |                              |                                |
| Falls                                  | 10                           | 6                              |
| p-value                                | p=0.44                       |                                |
| Fractures                              | 1                            | 2                              |
| p-value                                | p=1.00                       |                                |
| Serious adverse<br>events (admissions) |                              |                                |
| One                                    | 9                            | 8                              |
| Two                                    | 1                            | 7                              |
| Total                                  | 11                           | 22                             |
| p-value                                | p=0.12                       |                                |

**ESM Table 2** Outcomes for ADT population, according to group allocation

|                                                                               | Football group (n=46) |                         | Usual care group (n=41) |                          | Covariance analysis, difference between groups, mean (95% CI) |         | Unadjusted analyses, t-test, difference between groups, mean (95% CI) |         |
|-------------------------------------------------------------------------------|-----------------------|-------------------------|-------------------------|--------------------------|---------------------------------------------------------------|---------|-----------------------------------------------------------------------|---------|
|                                                                               | n                     | Mean (95% CI)           | n                       | Mean (95% CI)            | Adjusted for ADT, age, and baseline score                     | p value | Unadjusted                                                            | p value |
| Change in prostate cancer-specific quality of life (points, higher is better) |                       |                         |                         |                          |                                                               |         |                                                                       |         |
| 12 weeks                                                                      | 43                    | -1.3 (-4.6 to 1.9)      | 40                      | -3.5 (-6.8 to 0.2)       | 2.2 (-2.3 to 6.6)                                             | 0.33    | 2.1 (-2.5 to 6.7)                                                     | 0.36    |
| 6 months                                                                      | 42                    | -3.5 (-6.8 to -0.3)     | 37                      | -4.6 (-8.0 to -1.1)      | 0.9 (-3.9 to 5.7)                                             | 0.71    | 1.0 (-3.7 to 5.8)                                                     | 0.67    |
| Change in lean body mass (kilograms)                                          |                       |                         |                         |                          |                                                               |         |                                                                       |         |
| 6 months                                                                      | 44                    | -0.2 (-0.8 to 0.3)      | 37                      | -0.5 (-1.0 to 0.1)       | 0.2 (-0.7 to 1.0)                                             | 0.69    | 0.2 (-0.6 to 1.0)                                                     | 0.58    |
| Change in fat mass (kilograms)                                                |                       |                         |                         |                          |                                                               |         |                                                                       |         |
| 6 months                                                                      | 44                    | -0.2 (-0.8 to 0.5)      | 37                      | 0.2 (-0.5 to 0.9)        | -0.4 (-1.4 to 0.6)                                            | 0.42    | -0.4 (-1.4 to 0.5)                                                    | 0.39    |
| Change in whole-body bone mineral content (grams)                             |                       |                         |                         |                          |                                                               |         |                                                                       |         |
| 6 months                                                                      | 44                    | 22.8 (0.1 to 45.5)      | 37                      | 0.2 (-22.0 to 27.0)      | 22.0 (-12.4 to 56.3)                                          | 0.21    | 20.6 (-13.0 to 54.2)                                                  | 0.23    |
| Change in whole-body bone mineral density (grams/cm <sup>2</sup> )            |                       |                         |                         |                          |                                                               |         |                                                                       |         |
| 6 months                                                                      | 44                    | 0.005 (-0.002 to 0.013) | 37                      | -0.001 (-0.009 to 0.008) | 0.005 (-0.007 to 0.017)                                       | 0.40    | 0.006 (-0.006 to 0.017)                                               | 0.31    |
| Femoral neck BMD (grams/cm <sup>2</sup> )                                     |                       |                         |                         |                          |                                                               |         |                                                                       |         |
| 6 months                                                                      | 44                    | 0.009 (-0.002 to 0.019) | 37                      | 0.003 (-0.009 to 0.014)  | 0.007 (-0.009 to 0.023)                                       | 0.39    | 0.006 (-0.009 to 0.021)                                               | 0.47    |
| Change in total hip BMD (grams/cm <sup>2</sup> )                              |                       |                         |                         |                          |                                                               |         |                                                                       |         |
| 6 months                                                                      | 44                    | 0.005 (-0.011 to 0.021) | 37                      | 0.015 (-0.003 to 0.032)  | -0.009 (0.033 to 0.014)                                       | 0.43    | -0.010 (-0.033 to 0.014)                                              | 0.42    |
| Change in lumbar spine L1-L4 BMD (grams/cm <sup>2</sup> )                     |                       |                         |                         |                          |                                                               |         |                                                                       |         |
| 6 months                                                                      | 44                    | 0.025 (0.001 to 0.050)  | 37                      | 0.013 (-0.014 to 0.039)  | 0.017 (-0.019 to 0.053)                                       | 0.34    | 0.013 (-0.023 to 0.048)                                               | 0.48    |
| Change in weekly physical activity (MET-minutes)                              |                       |                         |                         |                          |                                                               |         |                                                                       |         |
| 12 weeks                                                                      | 40                    | 2405 (-396 to 5205)     | 32                      | 3174 (43 to 6305)        | -845 (-4920 to 3229)                                          | 0.68    | -770 (-4970 to 3431)                                                  | 0.72    |
| 6 months                                                                      | 38                    | 1060 (-475 to 2595)     | 31                      | 1505 (-195 to 3204)      | -312 (-2501 to 1878)                                          | 0.78    | -444 (-2734 to 1845)                                                  | 0.70    |
| Change in general physical health (SF-12)                                     |                       |                         |                         |                          |                                                               |         |                                                                       |         |
| 12 weeks                                                                      | 43                    | -1.4 (-3.0 to 0.3)      | 40                      | -1.8 (-3.5 to -0.1)      | -0.0 (-2.3 to 2.2)                                            | 0.98    | 0.4 (-1.9 to 2.8)                                                     | 0.72    |
| 6 months                                                                      | 42                    | -2.7 (-4.9 to -0.4)     | 37                      | -1.8 (4.1 to 0.6)        | -1.0 (-4.2 to 2.1)                                            | 0.51    | -0.9 (-4.1 to 2.4)                                                    | 0.59    |
| Change in general mental health (SF-12)                                       |                       |                         |                         |                          |                                                               |         |                                                                       |         |
| 12 weeks                                                                      | 43                    | 0.3 (-1.9 to 2.5)       | 40                      | -2.0 (4.2 to 0.3)        | 2.5 (-0.2 to 5.3)                                             | 0.07    | 2.3 (-0.8 to 5.4)                                                     | 0.15    |
| 6 months                                                                      | 42                    | -0.2 (-2.8 to 2.4)      | 37                      | -3.7 (-6.5 to -1.0)      | 3.5 (-0.1 to 7.2)                                             | 0.06    | 3.5 (-0.3 to 7.3)                                                     | 0.07    |

**ESM Table 3** Safety outcomes for ADT Population

|                                        | Football<br>group<br>(n=46) | Usual care<br>group (n=41) |
|----------------------------------------|-----------------------------|----------------------------|
| Safety outcomes                        |                             |                            |
| Falls                                  | 5                           | 4                          |
| p-value                                | p=1.00                      |                            |
| Fractures                              | 1                           | 1                          |
| p-value                                | p=1.00                      |                            |
| Serious adverse<br>events (admissions) |                             |                            |
| One                                    | 4                           | 1                          |
| Two                                    | 0                           | 3                          |
| Total                                  | 4                           | 7                          |
| p-value                                | p=0.11                      |                            |

**ESM Table 4** Outcomes for per-protocol population, according to group allocation

| (Minimum attendance for football 50%)                                                     | Football group |                         | Usual care group |                         | Covariance analysis, difference between groups, mean (95% CI) |         | Unadjusted analyses, t-test, difference between groups, mean (95% CI) |         |
|-------------------------------------------------------------------------------------------|----------------|-------------------------|------------------|-------------------------|---------------------------------------------------------------|---------|-----------------------------------------------------------------------|---------|
|                                                                                           | n              | Mean (95% CI)           | n                | Mean (95% CI)           | Adjusted for risk variables*                                  | p value | Unadjusted                                                            | p value |
| Change in prostate cancer-specific quality of life (FACT-P total score, higher is better) |                |                         |                  |                         |                                                               |         |                                                                       |         |
| 12 weeks                                                                                  | 82             | -0.7 (-3.1 to 1.7)      | 104              | -2.5 (-4.6 to -0.4)     | 3.0 (-0.2 to 6.1)                                             | 0.06    | 1.8 (-1.4 to 5.0)                                                     | 0.26    |
| 6 months                                                                                  | 70             | -0.7 (-3.3 to 2.0)      | 100              | -1.7 (-4.0 to 0.5)      | 1.8 (-1.6 to 5.2)                                             | 0.30    | 1.1 (-2.4 to 4.6)                                                     | 0.55    |
| Change in lean body mass (kg)                                                             |                |                         |                  |                         |                                                               |         |                                                                       |         |
| 6 months                                                                                  | 71             | -0.2 (-0.6 to 0.2)      | 100              | -0.1 (-0.5 to 0.2)      | -0.0 (-0.6 to 0.5)                                            | 0.88    | -0.1 (-0.7 to 0.4)                                                    | 0.63    |
| Change in fat mass (kg)                                                                   |                |                         |                  |                         |                                                               |         |                                                                       |         |
| 6 months                                                                                  | 71             | -0.3 (-0.9 to 0.4)      | 100              | 0.0 (-0.4 to 0.4)       | -0.2 (-0.8 to 0.5)                                            | 0.65    | -0.3 (-0.9 to 0.4)                                                    | 0.37    |
| Change in whole-body bone mineral content (g)                                             |                |                         |                  |                         |                                                               |         |                                                                       |         |
| 6 months                                                                                  | 71             | 14.7 (-2.2 to 31.6)     | 100              | 4.3 (-9.9 to 18.6)      | 8.3 (-14.8 to 31.4)                                           | 0.48    | 10.4 (-11.7 to 32.5)                                                  | 0.36    |
| Change in whole-body BMD (g/cm <sup>2</sup> )                                             |                |                         |                  |                         |                                                               |         |                                                                       |         |
| 6 months                                                                                  | 71             | 0.005 (-0.001 to 0.010) | 100              | 0.001 (-0.003 to 0.006) | 0.001 (-0.007 to 0.009)                                       | 0.79    | 0.003 (-0.004 to 0.011)                                               | 0.39    |
| Femoral neck BMD (g/cm <sup>2</sup> )                                                     |                |                         |                  |                         |                                                               |         |                                                                       |         |
| 6 months                                                                                  | 71             | 0.011 (0.004 to 0.018)  | 100              | 0.003 (-0.003 to 0.009) | 0.008 (-0.002 to 0.017)                                       | 0.10    | 0.008 (-0.001 to 0.017)                                               | 0.08    |
| Change in total hip BMD (g/cm <sup>2</sup> )                                              |                |                         |                  |                         |                                                               |         |                                                                       |         |
| 6 months                                                                                  | 71             | 0.001 (-0.008 to 0.011) | 100              | 0.006 (-0.002 to 0.013) | -0.007 (-0.019 to 0.005)                                      | 0.25    | -0.004 (-0.016 to 0.008)                                              | 0.50    |
| Change in lumbar spine L1-L4 BMD (g/cm <sup>2</sup> )                                     |                |                         |                  |                         |                                                               |         |                                                                       |         |
| 6 months                                                                                  | 71             | 0.014 (0.000 to 0.029)  | 100              | 0.011 (-0.001 to 0.023) | -0.001 (-0.021 to 0.018)                                      | 0.89    | 0.003 (-0.015 to 0.022)                                               | 0.72    |
| Change in weekly physical activity (MET minutes)                                          |                |                         |                  |                         |                                                               |         |                                                                       |         |
| 12 weeks                                                                                  | 74             | 1710 (328 to 3092)      | 89               | 638 (-797 to 2073)      | 2269 (-144 to 4683)                                           | 0.07    | 1072 (-920 to 3064)                                                   | 0.29    |
| 6 months                                                                                  | 63             | 394 (-1151 to 1938)     | 87               | 928 (-386 to 2242)      | 98 (-2021 to 2216)                                            | 0.93    | -534 (-2562 to 1494)                                                  | 0.60    |
| Change in general physical health (SF-12)                                                 |                |                         |                  |                         |                                                               |         |                                                                       |         |
| 12 weeks                                                                                  | 82             | -1.3 (-2.5 to -0.0)     | 104              | -1.7 (-2.8 to -0.6)     | 0.5 (-1.3 to 2.3)                                             | 0.59    | 0.4 (-1.3 to 2.1)                                                     | 0.64    |
| 6 months                                                                                  | 70             | -2.0 (-3.4 to -0.6)     | 100              | -1.3 (-2.5 to -0.2)     | -0.5 (-2.4 to 1.3)                                            | 0.57    | -0.7 (-2.4 to 1.1)                                                    | 0.46    |
| Change in general mental health (SF-12)                                                   |                |                         |                  |                         |                                                               |         |                                                                       |         |
| 12 weeks                                                                                  | 82             | -0.1 (-1.6 to 1.4)      | 104              | -0.8 (-2.2 to 0.5)      | 0.8 (-1.3 to 2.9)                                             | 0.49    | 0.8 (-1.3 to 2.8)                                                     | 0.46    |
| 6 months                                                                                  | 70             | 1.1 (-0.6 to 2.9)       | 100              | -1.5 (-2.9 to 0.0)      | 2.5 (0.2 to 4.8)                                              | 0.03    | 2.6 (0.3 to 4.9)                                                      | 0.03    |

\* Risk variables used to adjust for confounding when analysing adherence: smoking, alcohol consumption, employment status, education, marital status, disease stage, Gleason score, treatment, and co-morbidities

**ESM Table 5** Safety outcomes for PP population

|                                       | Football<br>group (n=82) | Usual care<br>group<br>(n=105) |
|---------------------------------------|--------------------------|--------------------------------|
| Safety outcomes                       |                          |                                |
| Falls                                 | 9                        | 6                              |
| p-value                               | p=0.17                   |                                |
| Fractures                             | 1                        | 2                              |
| p-value                               | p=1.00                   |                                |
| Serious adverse<br>events(admissions) |                          |                                |
| One                                   | 7                        | 8                              |
| Two                                   | 0                        | 7                              |
| Total                                 | 7                        | 22                             |
| p-value                               | p=0.07                   |                                |

**ESM Table 6** Injuries in football group

|                              | Number of injuries | Percent of all injuries |
|------------------------------|--------------------|-------------------------|
| Reason for injury            |                    |                         |
| All injuries                 | 60                 | 100                     |
| Overuse injuries             | 19                 | 32                      |
| Acute/traumatic injuries     | 41                 | 68                      |
| Injured region               |                    |                         |
| Chest/ribs/upper back        | 4                  | 7                       |
| Lower back/sacrum/Ilium      | 2                  | 3                       |
| Shoulder/clavicle            | 1                  | 2                       |
| Wrist                        | 1                  | 2                       |
| Hand/fingers                 | 1                  | 2                       |
| Hip/groin                    | 3                  | 5                       |
| Thigh                        | 18                 | 30                      |
| Knee                         | 5                  | 8                       |
| Lower leg/Achilles tendon    | 21                 | 35                      |
| Ankle                        | 4                  | 7                       |
| Injury type                  |                    |                         |
| Bent rib cage                | 1                  | 2                       |
| Dislocation/subluxation      | 2                  | 3                       |
| Sprains                      | 11                 | 18                      |
| Lesion of meniscus/cartilage | 1                  | 2                       |
| Tendon irritation            | 10                 | 17                      |
| Partial tendon rupture       | 1                  | 2                       |
| Tendon rupture               | 1                  | 2                       |
| Hematoma/contusion           | 2                  | 3                       |
| Excoriation/scratch          | 1                  | 2                       |
| Muscle strain                | 29                 | 48                      |
| Bursa irritation             | 1                  | 2                       |

ESM Figure 1. Weekly physical activity, according to allocation group

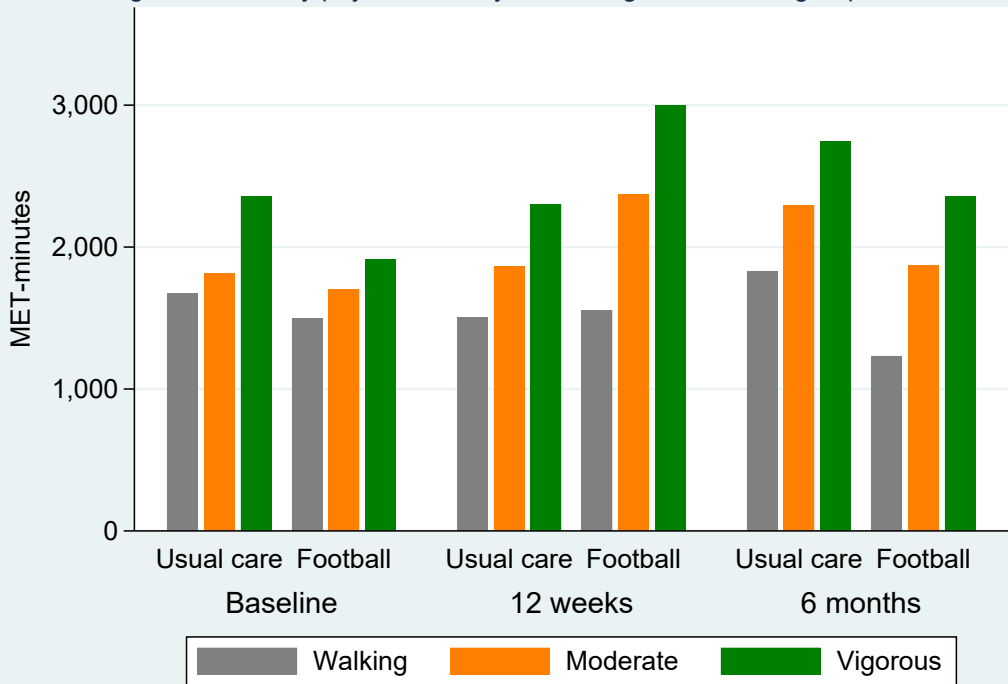



## Supplementary centre level information

Scanners used for Dual-energy X-ray Absorptiometry: Aarhus: Discovery A, Hologic; Copenhagen: Lunar Prodigy Advanced Scanner, GE Healthcare; Esbjerg: Discovery A, Hologic; Odense: Discovery A, Hologic.

Participants enrolled and randomised at each centre: Copenhagen (n=106), Aarhus (n=56), Esbjerg (n=37) and Odense (n=15).
